# Supplementary material for: Computational design of CO-tolerant Pt3M anode electrocatalysts for proton-exchange membrane fuel cells
Source: Royal Society of Chemistry journal article supplement (doi:10.1039/c8cp07086e), 2019-01-01
Supplement: c8cp07086e1.xlsx [file c8cp07086e1.xlsx]

## Sheet: Sheet1
		Pt3Sc Total energy (eV)	Binding energy (eV)	Pt3Ti Total energy (eV)	Binding energy (eV)	Pt3V Total energy (eV)	Binding Energy (eV)	Pt3Cr Total energy (eV)	Binding energy (eV)	Pt3Mn Total energy (eV)	Binding energy (eV)	Pt3Fe Total energy (eV)	Binding energy (eV)	Pt3Co Total energy (eV)	Binding energy (eV)	Pt3Ni Total energy (eV)	Binding energy (eV)	Pt3Cu Total energy (eV)	Binding energy (eV)	Pt3Zn Total energy (eV)	Binding energy (eV)	Pt3Ga Total energy (eV)	Binding energy (eV)	Pt3Ge Total energy (eV)	Binding energy (eV)
CO1	bri_M	-102.626	-1.39464	-103.18	-1.43304	-102.408	-1.01298	-102.754	-1.42818	-102.848	-1.49412	-99.9787	-0.01193	-98.9321	-0.80254	-97.8153	-1.45993	-96.6958	-1.58622	-95.1867	-1.46285	-97.476	-1.4016	-98.7169	-1.44924
CO1	bri_Pt	-102.718	-1.48628	-103.249	-1.50172	-102.854	-1.45894	-102.838	-1.51252	-102.892	-1.53804	-101.505	-1.53788	-99.6424	-1.51276	-98.0951	-1.73981	-96.7257	-1.61607	-95.2387	-1.5149	-97.4811	-1.40675	-98.5798	-1.31213
CO1	fcc_M	-102.717	-1.48559	-103.248	-1.50125	-102.854	-1.45825	-101.754	-0.42824	-102.891	-1.5374	-101.504	-1.53675	-98.9244	-0.7948	-98.0932	-1.73793	-96.7253	-1.6157	-95.2341	-1.51032	-97.4804	-1.40604	-98.5782	-1.31052
CO1	fcc_Pt	-102.662	-1.43117	-103.174	-1.42692	-102.765	-1.36968	-102.784	-1.45847	-102.907	-1.55348	-101.501	-1.53456	-99.6109	-1.48132	-98.0751	-1.71978	-96.7875	-1.67788	-95.2914	-1.56757	-97.4925	-1.41817	-98.5347	-1.267
CO1	hcp_M	-102.675	-1.44353	-103.174	-1.42692	-102.801	-1.40584	-101.897	-0.57133	-102.876	-1.52208	-99.9728	-0.00604	-99.6061	-1.47651	-98.0662	-1.71089	-96.7298	-1.62021	-95.2141	-1.49031	-97.441	-1.3666	-98.634	-1.3663
CO1	hcp_Pt	-102.683	-1.45178	-103.199	-1.45198	-102.798	-1.40288	-102.823	-1.49721	-102.901	-1.54705	-101.484	-1.51698	-99.6227	-1.49309	-98.0933	-1.73797	-96.7627	-1.65305	-95.2853	-1.56149	-97.4909	-1.41653	-98.5502	-1.28253
CO1	top_M	-101.639	-0.407233	-102.437	-0.69021	-102.4	-1.00445	-101.852	-0.52642	-101.772	-0.41863	-100.63	-0.66319	-99.2105	-1.08091	-97.5808	-1.22551	-95.559	-0.44934	-93.6561	0.06771	-96.0111	0.0633	-97.2464	0.02132
CO1	top_Pt	-102.634	-1.40244	-103.202	-1.45531	-102.811	-1.41537	-102.777	-1.45088	-102.859	-1.50527	-101.479	-1.51256	-99.6124	-1.48284	-98.0569	-1.70157	-96.7141	-1.60443	-95.2275	-1.50366	-97.4569	-1.38253	-98.5578	-1.29014
CO2	bri_M	-116.552	-0.87744	-117.592	-1.40218	-117.673	-1.83503	-117.423	-1.65459	-117.12	-1.32307	-116.168	-1.75771	-114.57	-1.99755	-113.175	-2.37658	-111.953	-2.39987	-110.154	-1.98722	-112.194	-1.67632	-113.212	-1.5012
CO2	bri_Pt	-118.024	-2.34929	-118.335	-2.14513	-118.037	-2.19897	-118.099	-2.33013	-118.516	-2.71865	-117.079	-2.66919	-114.887	-2.31453	-113.585	-2.78717	-112.481	-2.92789	-110.927	-2.76064	-113.018	-2.50063	-114.045	-2.3343
CO2	fcc_hcp_M	-117.783	-2.10825	-118.37	-2.1802	-117.793	-1.95458	-118.156	-2.38712	-118.183	-2.38637	-116.782	-2.37174	-114.723	-2.15053	-113.621	-2.82294	-112.226	-2.6736	-110.481	-2.31419	-112.586	-2.06886	-113.619	-1.90801
CO2	fcc_hcp_Pt	-118.145	-2.47049	-118.653	-2.46329	-118.23	-2.39167	-118.405	-2.63621	-118.554	-2.75704	-117.114	-2.70449	-114.639	-2.06671	-113.802	-3.00377	-112.534	-2.9817	-110.967	-2.79973	-113.037	-2.5192	-114.014	-2.30284
CO2	top_fcc_MPt	-117.482	-1.80794	-118.179	-1.98908	-118.054	-2.2151	-117.903	-2.13365	-116.712	-0.91496	-116.398	-1.98774	-114.747	-2.17463	-113.418	-2.62004	-111.502	-1.94952	-109.693	-1.52646	-111.905	-1.38729	-112.971	-1.26021
CO2	top_PtM	-117.161	-1.48715	-117.928	-1.73796	-117.842	-2.00356	-117.6	-1.83126	-117.257	-1.46007	-116.092	-1.68222	-114.478	-1.90506	-113.066	-2.26773	-111.117	-1.56387	-109.251	-1.08383	-111.729	-1.21123	-112.925	-1.21398
CO2	top_Pt	-117.887	-2.21253	-118.426	-2.23632	-118.029	-2.1908	-118.116	-2.3471	-118.222	-2.42541	-116.807	-2.39726	-114.933	-2.36066	-113.482	-2.68384	-112.168	-2.61506	-110.584	-2.4171	-112.705	-2.18765	-113.731	-2.0199
CO3	fcc_hcp_top_M	-132.828	-2.71112	-133.45	-2.81715	-133.306	-3.02409	-133.317	-3.10561	-133.073	-2.83334	-131.715	-2.86198	-130.147	-3.13136	-128.83	-3.58834	-127.03	-3.03446	-125.327	-2.71709	-127.451	-2.49059	-128.444	-2.28994
CO3	fcc_hcp_top_Pt	-132.724	-2.60707	-133.365	-2.73178	-133.263	-2.98119	-132.79	-2.57844	-132.076	-1.83661	-131.919	-3.06656	-130.259	-3.2436	-129.093	-3.85172	-127.567	-3.5718	-125.608	-2.9984	-127.523	-2.56224	-128.471	-2.31748
CO3	fcc_M	-131.23	-1.11247	-132.283	-1.64951	-132.507	-2.22567	-132.38	-2.16856	-132.05	-1.80985	-130.748	-1.89499	-129.705	-2.68985	-128.347	-3.10593	-126.246	-2.24993	-123.907	-1.29718	-125.695	-0.73421	-126.614	-0.46017
CO3	top_M	-132.066	-1.94904	-132.769	-2.13641	-132.659	-2.37762	-132.506	-2.2943	-132.195	-1.95538	-130.977	-2.12462	-129.406	-2.39076	-127.974	-2.73266	-126.105	-2.1091	-124.397	-1.78675	-126.939	-1.97905	-128.075	-1.92093
CO3	top_Pt	-132.461	-2.34392	-132.972	-2.339	-132.63	-2.34833	-132.87	-2.65865	-132.972	-2.73227	-130.137	-1.28383	-129.202	-2.18687	-128.345	-3.10391	-127.03	-3.03413	-125.355	-2.74531	-127.335	-2.37431	-128.305	-2.15134
COO	fcc_hcp_M	-108.729	-0.31956	-109.667	-0.74212	-109.754	-1.18031	-108.8	-0.29609	-107.481	1.05037	-107.209	-0.06453	-105.165	0.14308	-103.724	-0.19085	-102.07	0.21809	-100.498	0.40416	-102.817	0.43537	-103.829	0.61708
COO	fcc_hcp_Pt	-107.649	0.76069	-108.108	0.8167	-107.757	0.81647	-108.019	0.48509	-108.108	0.4236	-105.281	1.86337	-104.848	0.45965	-103.488	0.0453	-102.191	0.09636	-100.487	0.41444	-102.434	0.81879	-103.554	0.89129
COO	fcc_top_M	-107.37	1.03951	-108.059	0.86617	-107.962	0.61187	-107.958	0.54536	-107.639	0.89245	-106.385	0.76024	-104.89	0.41805	-103.501	0.03222	-101.645	0.64273	-99.6735	1.22835	-101.667	1.58566	-102.87	1.57575
COO	fcc_top_Pt	-109.247	-0.83762	-109.975	-1.04966	-109.949	-1.37583	-108.987	-0.48328	-107.789	0.74316	-106.584	0.56043	-105.416	-0.10815	-104.167	-0.63335	-102.567	-0.27921	-101.063	-0.16101	-103.32	-0.06805	-104.177	0.26837
COOH	top_MPt	-113.446	-1.55146	-114.037	-1.62664	-113.563	-1.50486	-113.133	-1.14447	-111.396	0.62079	-110.142	0.48763	-108.835	-0.04239	-107.596	-0.57773	-105.854	-0.08134	-104.615	-0.22806	-107.252	-0.51481	-108.547	-0.61595
COOH	top_PtM	-111.921	-0.02637	-112.115	0.29487	-111.971	0.08711	-111.773	0.21634	-111.463	0.5535	-110.209	0.42048	-108.537	0.25544	-107.15	-0.13154	-105.287	0.48523	-103.52	0.86703	-105.711	1.02675	-106.986	0.94501
COOH	top_Pt	-113.321	-1.42629	-113.218	-0.80759	-112.394	-0.33535	-112.37	-0.38097	-112.461	-0.44422	-111.058	-0.42807	-109.188	-0.39542	-107.666	-0.64802	-106.332	-0.55939	-104.805	-0.41836	-107.047	-0.30979	-108.269	-0.3381
O1	fcc_M	-93.4843	0.48199	-94.1714	0.31063	-94.2786	-0.14822	-93.3222	0.73867	-92.0148	2.0741	-91.7865	0.91533	-89.8902	0.97441	-88.3043	0.78602	-86.6613	1.18335	-85.2123	1.24654	-87.5791	1.23022	-88.4677	1.53503
O1	fcc_Pt	-92.543	1.42333	-92.9918	1.49026	-92.6267	1.50369	-92.7957	1.26515	-92.8681	1.22079	-91.4221	1.27969	-89.5854	1.27924	-88.1399	0.9504	-86.8156	1.02903	-85.2117	1.24707	-87.2937	1.51563	-88.4316	1.57114
O1	hcp_M	-93.1786	0.78766	-93.9289	0.55314	-94.2778	-0.14738	-93.2441	0.81672	-92.8911	1.19773	-91.488	1.2138	-89.6038	1.26081	-87.9617	1.12865	-86.3585	1.48618	-84.8765	1.58229	-87.2093	1.60002	-88.1689	1.83376
O1	hcp_Pt	-92.231	1.73525	-92.676	1.80601	-92.3221	1.80828	-92.4334	1.62744	-92.5073	1.58155	-91.0671	1.63469	-89.2505	1.61407	-87.7892	1.30111	-86.459	1.38568	-84.8247	1.63412	-86.9088	1.90054	-88.1141	1.8886
O2	fcc_hcp_M	-99.2584	1.88589	-100.311	1.34882	-100.649	0.65945	-99.5632	1.67564	-98.6553	2.61157	-97.0452	2.83461	-95.1586	2.88401	-93.4367	2.8316	-91.4951	3.52757	-90.0267	3.61014	-92.4164	3.57093	-93.2858	3.89486
O2	fcc_hcp_Pt	-97.0631	4.08118	-97.4767	4.18333	-97.2066	4.10187	-96.3061	4.93274	-95.6474	5.61943	-94.7357	5.14411	-94.3204	3.72217	-92.9304	3.3379	-91.6072	3.41539	-89.9191	3.71767	-91.9438	4.04356	-93.1526	4.02813
O2	fcc_M	-99.7769	1.36742	-100.658	1.00233	-100.381	0.92767	-99.3916	1.8472	-98.2295	3.03739	-97.5893	2.29051	-95.709	2.33361	-94.1835	2.08481	-92.1597	2.86296	-90.743	2.89383	-93.2774	2.70993	-94.3291	2.85158
O2	fcc_PtM	-98.5598	2.58447	-99.6705	1.98951	-99.8876	1.42083	-99.1658	2.07304	-97.459	3.80788	-97.0622	2.81764	-95.0269	3.01574	-93.7172	2.55113	-92.0621	2.96053	-90.5491	3.08768	-92.8132	3.17419	-93.8754	3.30529
OH1	top_Pt	-97.727	-0.27569	-98.397	-0.42994	-97.9085	-0.29307	-96.6624	0.88341	-96.719	0.85482	-95.3053	0.88149	-93.4592	0.89038	-91.8619	0.7134	-90.4966	0.83301	-89.0347	0.90907	-91.3114	0.98296	-92.591	0.89672
OH1	top_M	-97.7617	-0.3104	-98.4029	-0.43588	-97.9294	-0.314	-97.4207	0.12517	-97.058	0.51587	-95.6863	0.5005	-93.655	0.6946	-91.7978	0.77752	-90.4628	0.86687	-89.0871	0.85675	-91.4918	0.80255	-93.0298	0.4579
OH2	top_PtM	-108.147	-0.03246	-108.604	0.02605	-108.665	-0.387	-107.638	0.57121	-105.782	2.45445	-104.471	2.37894	-103.69	1.32252	-101.844	1.39411	-100.499	1.49372	-98.8296	1.77723	-101.47	1.48744	-102.887	1.26357
OH2	top_Pt	-108.115	-0.00075	-108.55	0.07956	-108.624	-0.34556	-106.75	1.45894	-106.828	1.40925	-105.386	1.46357	-103.537	1.47519	-101.974	1.26386	-100.622	1.37084	-99.0991	1.50766	-101.298	1.65909	-102.561	1.59009
slab	slab	-86.7883		-87.304		-86.9524		-86.8829		-86.9109		-85.5238		-83.6866		-81.9123		-80.6666		-79.2808		-81.6314		-82.8247
	ECO	-14.443		-14.443		-14.443		-14.443		-14.443		-14.443		-14.443		-14.443		-14.443		-14.443		-14.443		-14.443
	EH2O	-14.148		-14.148		-14.148		-14.148		-14.148		-14.148		-14.148		-14.148		-14.148		-14.148		-14.148		-14.148
	EH2	-6.97		-6.97		-6.97		-6.97		-6.97		-6.97		-6.97		-6.97		-6.97		-6.97		-6.97		-6.97
		Pt3Y Total energy (eV)	Binding energy (eV)	Pt3Zr Total energy (eV)	Binding energy (eV)	Pt3Nb Total energy (eV)	Binding energy (eV)	Pt3Mo Total energy (eV)	Binding energy (eV)	Pt3Ru Total energy (eV)	Binding energy (eV)	Pt3Rh Total energy (eV)	Binding energy (eV)	Pt3Pd Total energy (eV)	Binding energy (eV)	Pt3Ag Total energy (eV)	Binding energy (eV)	Pt3Cd Total energy (eV)	Binding energy (eV)	Pt3In Total energy (eV)	Binding energy (eV)	Pt3Sn Total energy (eV)	Binding energy (eV)
CO1	bri_M	-102.84	-1.17153	-104.558	-1.26993	-104.386	-0.95816	-103.655	-1.18502	-101.451	-1.80206	-99.5143	-1.49274	-97.7265	-1.3858	-95.5678	-1.48896	-94.6056	-1.30559	-96.9659	-1.16206	-98.2749	-1.02659
CO1	bri_Pt	-103.01	-1.34173	-104.637	-1.34917	-104.774	-1.34578	-103.763	-1.29283	-101.061	-1.41252	-99.507	-1.48543	-97.8641	-1.52339	-95.5805	-1.50167	-94.6621	-1.3621	-97.0133	-1.20942	-98.3047	-1.05643
CO1	fcc_M	-103.01	-1.3415	-104.637	-1.349	-104.774	-1.34547	-103.63	-1.16014	-101.435	-1.78687	-99.5045	-1.48303	-97.8646	-1.52389	-95.5795	-1.50067	-94.6604	-1.36033	-97.0117	-1.2078	-98.3027	-1.05446
CO1	fcc_Pt	-103.029	-1.36041	-104.566	-1.27795	-104.711	-1.28238	-103.654	-1.18375	-100.974	-1.32546	-99.4228	-1.40133	-97.8626	-1.52188	-95.6627	-1.58393	-94.747	-1.44699	-97.0894	-1.28554	-98.3401	-1.09181
CO1	hcp_M	-102.99	-1.32163	-104.608	-1.31999	-104.747	-1.3186	-103.674	-1.20417	-101.063	-1.41482	-99.5266	-1.50512	-97.8564	-1.51569	-95.5907	-1.51192	-94.681	-1.38094	-97.0255	-1.22166	-98.298	-1.04971
CO1	hcp_Pt	-103.028	-1.3603	-104.581	-1.29322	-104.71	-1.28216	-103.683	-1.21269	-101.003	-1.35459	-99.4701	-1.44856	-97.8494	-1.50872	-95.6515	-1.57267	-94.7368	-1.43675	-97.0641	-1.26025	-98.3408	-1.09254
CO1	top_M	-102.02	-0.35165	-103.884	-0.59542	-104.368	-0.9401	-103.778	-1.30775	-101.476	-1.82717	-99.6918	-1.6703	-97.2398	-0.89907	-94.1063	-0.02746	-93.2967	0.00335	-95.7905	0.0133	-97.2393	0.00896
CO1	top_Pt	-102.845	-1.17663	-104.565	-1.2766	-104.714	-1.28524	-103.709	-1.23844	-100.972	-1.32387	-99.4096	-1.38809	-97.7944	-1.45373	-95.577	-1.49824	-94.612	-1.31196	-96.972	-1.16818	-98.2849	-1.03664
CO2	bri_M	-117.082	-0.97047	-118.825	-1.09355	-119.546	-1.67512	-119.12	-2.2072	-116.847	-2.75526	-115.14	-2.67584	-112.841	-2.05759	-110.531	-2.00871	-108.389	-0.64602	-110.704	-0.45686	-112.06	-0.36898
CO2	bri_Pt	-118.09	-1.97843	-119.514	-1.78334	-119.621	-1.75004	-119.27	-2.35645	-116.934	-2.84282	-115.315	-2.85068	-113.429	-2.64536	-111.321	-2.79921	-110.243	-2.49962	-112.365	-2.11812	-113.526	-1.8352
CO2	fcc_hcp_M	-117.691	-1.57988	-119.476	-1.74443	-119.917	-2.046	-119.222	-2.30873	-116.958	-2.86658	-115.316	-2.85145	-113.437	-2.65283	-110.852	-2.33016	-109.869	-2.12553	-112.146	-1.89867	-113.286	-1.59458
CO2	fcc_hcp_Pt	-118.106	-1.99472	-119.795	-2.06425	-119.832	-1.96082	-118.793	-1.87952	-116.386	-2.29431	-114.994	-2.52941	-113.486	-2.70248	-111.322	-2.79975	-110.243	-2.49986	-112.391	-2.14455	-113.546	-1.85433
CO2	top_fcc_MPt	-117.869	-1.75799	-119.526	-1.79511	-119.943	-2.07155	-119.213	-2.30031	-116.894	-2.80217	-115.304	-2.83932	-113.039	-2.25485	-110.137	-1.61512	-109.272	-1.52847	-111.591	-1.34395	-112.806	-1.1152
CO2	top_PtM	-117.426	-1.31451	-119.23	-1.49928	-119.691	-1.81989	-119.059	-2.14576	-116.731	-2.63937	-115.023	-2.55848	-112.636	-1.85195	-109.844	-1.32245	-108.993	-1.24958	-111.324	-1.07722	-112.643	-0.95149
CO2	top_Pt	-117.896	-1.78485	-119.603	-1.87143	-119.673	-1.80204	-118.678	-1.76453	-116.167	-2.07546	-114.691	-2.22609	-113.151	-2.36737	-110.932	-2.41006	-109.819	-2.07587	-112.054	-1.80677	-113.252	-1.56064
CO3	fcc_hcp_top_M	-132.893	-2.33872	-134.543	-2.36853	-134.862	-2.54738	-134.204	-2.84832	-132.094	-3.55968	-130.614	-3.7061	-128.385	-3.15817	-125.786	-2.82129	-124.763	-2.57722	-126.863	-2.17304	-127.986	-1.85139
CO3	fcc_hcp_top_Pt	-132.279	-1.72472	-134.557	-2.38251	-134.93	-2.61532	-134.504	-3.14835	-132.29	-3.75543	-130.744	-3.83632	-128.85	-3.62368	-126.026	-3.06082	-124.504	-2.31838	-126.522	-1.83207	-127.606	-1.47151
CO3	fcc_M	-130.537	0.01756	-133.083	-0.90846	-134.114	-1.80018	-133.94	-2.58391	-131.858	-3.32379	-130.141	-3.23313	-127.885	-2.65841	-124.396	-1.43073	-122.562	-0.37594	-124.567	0.12266	-125.624	0.50995
CO3	top_M	-132.267	-1.71322	-133.926	-1.75197	-134.296	-1.98185	-133.687	-2.331	-131.503	-2.96799	-129.86	-2.95247	-127.419	-2.19198	-125.271	-2.30665	-124.149	-1.96253	-126.37	-1.68007	-127.605	-1.4706
CO3	top_Pt	-132.28	-1.7262	-133.955	-1.78112	-134.012	-1.69768	-133.066	-1.7098	-130.787	-2.25275	-129.457	-2.5498	-127.963	-2.73629	-125.709	-2.74466	-124.456	-2.27027	-126.509	-1.81872	-127.597	-1.4631
COO	fcc_hcp_M	-108.726	0.11969	-110.813	-0.34685	-111.977	-1.37113	-110.579	-0.93099	-107.305	-0.47803	-105.318	-0.11828	-103.081	0.43773	-100.436	0.82107	-99.5023	0.97579	-101.878	1.10412	-103.108	1.31852
COO	fcc_hcp_Pt	-107.777	1.0687	-109.278	1.18833	-109.3	1.3065	-108.287	1.36075	-106.005	0.82147	-104.725	0.47423	-103.226	0.29308	-100.983	0.27385	-99.7256	0.75245	-101.756	1.22578	-102.982	1.4441
COO	fcc_top_M	-107.576	1.27022	-109.222	1.24418	-109.581	1.02571	-108.942	0.70583	-107.017	-0.19081	-105.457	-0.25742	-103.1	0.41918	-100.179	1.07824	-99.0667	1.41137	-101.235	1.74654	-102.503	1.92327
COO	fcc_top_Pt	-109.302	-0.45605	-111.256	-0.78978	-112.169	-1.56265	-110.971	-1.32248	-107.35	-0.52316	-105.533	-0.33338	-103.554	-0.03503	-100.986	0.27046	-100.121	0.35727	-102.496	0.48568	-103.679	0.74701
COOH	top_MPt	-113.822	-1.49085	-115.784	-1.8329	-115.813	-1.72192	-114.552	-1.41857	-111.109	-0.79692	-109.16	-0.4751	-107.035	-0.03133	-104.227	0.51433	-103.741	0.22193	-106.575	-0.10808	-108.16	-0.24826
COOH	top_PtM	-112.561	-0.23016	-114.211	-0.25979	-113.948	0.14348	-113.236	-0.10262	-110.866	-0.55473	-109.16	-0.47596	-106.804	0.19981	-103.94	0.80145	-103.074	0.88905	-105.468	0.99841	-106.786	1.12508
COOH	top_Pt	-113.746	-1.41477	-115.744	-1.79305	-115.716	-1.625	-113.753	-0.61957	-110.495	-0.18317	-108.949	-0.26458	-107.349	-0.34574	-105.153	-0.4111	-104.145	-0.18199	-106.437	0.02993	-107.726	0.18508
O1	fcc_M	-93.7598	0.64329	-95.6063	0.41679	-96.6263	-0.463	-95.4623	-0.25724	-91.6744	0.7092	-89.8327	0.9238	-87.7987	1.277	-85.2257	1.58807	-84.4611	1.57395	-86.9337	1.60517	-88.2238	1.75944
O1	fcc_Pt	-92.8043	1.5988	-94.2569	1.76623	-94.2907	1.87256	-93.3045	1.90056	-90.8878	1.49577	-89.477	1.27957	-87.933	1.14268	-85.6903	1.12345	-84.5831	1.45199	-86.7674	1.77141	-88.0512	1.9321
O1	hcp_M	-93.4811	0.92195	-95.3397	0.68341	-96.6262	-0.46289	-95.4627	-0.25769	-91.4686	0.91497	-89.4817	1.27478	-87.4592	1.61645	-85.6902	1.12358	-84.2141	1.82093	-86.6088	1.93004	-87.9	2.08325
O1	hcp_Pt	-92.5028	1.90026	-93.9848	2.0383	-94.0167	2.14661	-93.0343	2.17077	-90.5688	1.8148	-89.131	1.62554	-87.5662	1.50947	-85.3383	1.47553	-84.1882	1.84684	-86.3718	2.16708	-87.7304	2.2529
O2	fcc_hcp_M	-99.2956	2.28554	-101.592	1.60892	-102.966	0.37522	-101.612	0.77094	-97.1624	2.39919	-94.9073	3.02719	-92.4884	3.76527	-90.5567	3.43508	-89.6344	3.57868	-91.5233	4.19356	-92.7647	4.39654
O2	fcc_hcp_Pt	-98.7481	2.83301	-98.536	4.66514	-98.5069	4.83442	-97.6332	4.74984	-95.441	4.12059	-94.1213	3.81322	-92.6242	3.62949	-90.423	3.56877	-89.1371	4.07597	-91.2107	4.50614	-92.5036	4.65764
O2	fcc_M	-99.5783	2.00276	-101.943	1.25806	-102.389	0.95234	-101.1	1.28346	-97.5378	2.02385	-95.4946	2.43996	-93.1644	3.08929	-90.3763	3.61549	-89.7245	3.48857	-92.2648	3.45209	-93.8968	3.26448
O2	fcc_PtM	-98.7484	2.83274	-101.129	2.07174	-102.013	1.32878	-100.857	1.5261	-96.8676	2.69404	-95.0924	2.84216	-93.0885	3.16524	-90.5567	3.43505	-89.6344	3.57861	-91.8337	3.88318	-93.1229	4.03833
OH1	top_Pt	-98.3016	-0.41354	-100.331	-0.82252	-100.317	-0.66852	-97.8126	0.87744	-94.8879	0.98073	-93.2893	0.95225	-91.6345	0.92621	-89.4298	0.86902	-88.6352	0.88488	-91.1326	0.89129	-92.3293	1.13894
OH1	top_M	-98.4192	-0.53108	-100.337	-0.82889	-100.318	-0.66967	-99.0062	-0.31615	-95.477	0.3916	-93.4775	0.76403	-91.2668	1.29393	-88.4223	1.87655	-88.0394	1.48066	-91.025	0.99881	-92.8229	0.64534
OH2	top_PtM	-108.971	-0.41947	-110.575	-0.40399	-110.951	-0.63927	-109.734	-0.3807	-105.473	1.05886	-103.457	1.44757	-101.269	1.95421	-99.4468	1.51498	-97.9764	2.20666	-100.826	1.86092	-102.514	1.61704
OH2	top_Pt	-108.765	-0.21357	-110.589	-0.41748	-110.932	-0.62115	-109.705	-0.35212	-104.876	1.65565	-103.304	1.60062	-101.682	1.54146	-99.5163	1.44552	-98.7075	1.47555	-100.857	1.83023	-102.165	1.9665
slab	slab	-87.2251		-88.8451		-88.9853		-88.0271		-85.2056		-83.5785		-81.8977		-79.6358		-78.857		-81.3608		-82.8053
		Pt3La Total energy (eV)	Binding energy (eV)	Pt3Hf Total energy (eV)	Binding energy (eV)	Pt3Ta Total energy (eV)	Binding energy (eV)	Pt3W Total energy (eV)	Binding energy (eV)	Pt3Re Total energy (eV)	Binding energy (eV)	Pt3Os Total energy (eV)	Binding energy (eV)	Pt3Ir Total energy (eV)	Binding energy (eV)	Pt Total energy (eV)	Binding energy (eV)	Pt3Au Total energy (eV)	Binding energy (eV)	Pt3Hg Total energy (eV)	Binding energy (eV)	Pt3Tl Total energy (eV)	Binding energy (eV)	Pt3Pb Total energy (eV)	Binding energy (eV)	Pt3Bi Total energy (eV)	Binding energy (eV)
CO1	bri_M	-101.193	-0.83687	-106.158	-1.30535	-106.176	-0.92009	-105.916	-1.38409	-104.774	-1.75774	-103.286	-2.05945	-101.251	-2.00524	-98.5225	-1.4197	-95.856	-1.38776	-93.2709	-1.17544	-95.5887	-0.87983	-97.2257	-0.76622	-97.422	-0.71749
CO1	bri_Pt	-101.816	-1.46009	-106.225	-1.37252	-106.586	-1.3295	-105.735	-1.20328	-104.22	-1.20383	-102.512	-1.28561	-100.638	-1.39225	-98.5233	-1.42052	-95.8602	-1.39196	-93.3451	-1.2496	-95.8042	-1.09534	-97.5998	-1.14036	-97.6599	-0.95543
CO1	fcc_M	-101.816	-1.46022	-106.225	-1.37216	-106.585	-1.3289	-105.909	-1.37703	-104.772	-1.75607	-103.28	-2.05425	-101.245	-1.99892	-98.5272	-1.42444	-95.8588	-1.39048	-93.3238	-1.2283	-95.8003	-1.09142	-97.5998	-1.14035	-97.6556	-0.95106
CO1	fcc_Pt	-101.818	-1.46265	-106.163	-1.31039	-106.549	-1.29242	-105.675	-1.14344	-104.094	-1.07842	-102.392	-1.16577	-100.541	-1.2955	-98.5282	-1.42546	-95.9643	-1.49604	-93.4318	-1.33632	-95.831	-1.12209	-97.6048	-1.14532	-97.6751	-0.97056
CO1	hcp_M	-101.817	-1.46131	-106.194	-1.34176	-106.566	-1.30971	-105.901	-1.36985	-104.778	-1.76229	-103.286	-2.05963	-100.747	-1.50143	-98.5327	-1.42998	-95.887	-1.41873	-93.3539	-1.25842	-95.7882	-1.07929	-97.6014	-1.14192	-97.6722	-0.9677
CO1	hcp_Pt	-101.817	-1.46125	-106.183	-1.3302	-106.541	-1.28497	-105.682	-1.14993	-104.145	-1.12873	-102.456	-1.2302	-100.613	-1.36739	-98.5328	-1.43004	-95.9276	-1.45937	-93.4054	-1.30995	-95.8058	-1.09697	-97.6007	-1.14119	-97.6612	-0.95673
CO1	top_M	-100.553	-0.19778	-105.475	-0.62227	-106.228	-0.97192	-105.94	-1.40859	-104.794	-1.7782	-103.295	-2.06878	-101.269	-2.02252	-98.4513	-1.34848	-94.5288	-0.06051	-92.0785	0.01699	-94.7003	0.00853	-96.4611	-0.0016	-96.6898	0.01466
CO1	top_Pt	-101.162	-0.80639	-106.169	-1.31684	-106.548	-1.29198	-105.718	-1.18626	-104.18	-1.16427	-102.434	-1.20813	-100.533	-1.28743	-98.451	-1.34819	-95.8663	-1.39802	-93.2768	-1.18137	-95.594	-0.88514	-97.233	-0.7735	-97.4363	-0.73184
CO2	bri_M	-115.84	-1.04095	-120.405	-1.10983	-121.306	-1.60714	-121.136	-2.16154	-120.024	-2.56498	-118.49	-2.82081	-116.455	-2.76568	-113.734	-2.18849	-110.698	-1.7864	-107.161	-0.62278	-109.613	-0.46149	-111.364	-0.46129	-111.729	-0.58113
CO2	bri_Pt	-116.914	-2.11546	-121.4	-2.10386	-121.425	-1.72553	-121.272	-2.29714	-120.13	-2.67128	-118.625	-2.956	-116.55	-2.8615	-113.735	-2.18969	-111.491	-2.58017	-108.798	-2.25999	-110.775	-1.62272	-112.196	-1.2933	-112.392	-1.24466
CO2	fcc_hcp_M	-116.914	-2.11542	-121.079	-1.78308	-121.748	-2.0484	-121.235	-2.26024	-120.16	-2.70088	-118.629	-2.96026	-116.561	-2.87165	-114.057	-2.51112	-111.049	-2.1382	-108.587	-2.04851	-110.605	-1.45302	-112.119	-1.21657	-112.244	-1.09657
CO2	fcc_hcp_Pt	-116.914	-2.11552	-121.432	-2.1365	-121.641	-1.94197	-120.675	-1.69997	-119.248	-1.78936	-117.674	-2.0045	-116.003	-2.3145	-114.057	-2.51108	-111.534	-2.62251	-108.799	-2.26009	-110.79	-1.63835	-112.226	-1.32337	-112.354	-1.20659
CO2	top_fcc_MPt	-116.515	-1.71615	-121.151	-1.85504	-121.816	-2.1162	-121.343	-2.36866	-120.143	-2.68451	-118.65	-2.9811	-116.737	-3.04807	-114.159	-2.61364	-110.377	-1.46616	-107.903	-1.36413	-110.32	-1.16772	-112.037	-1.13426	-112.106	-0.95871
CO2	top_PtM	-115.749	-0.95075	-120.856	-1.56007	-121.553	-1.85345	-121.161	-2.18599	-119.996	-2.53744	-118.471	-2.80159	-116.479	-2.79046	-113.713	-2.16715	-109.906	-0.99462	-107.669	-1.13075	-109.997	-0.84521	-111.636	-0.73349	-111.835	-0.68767
CO2	top_Pt	-115.888	-1.08915	-121.235	-1.93913	-121.488	-1.78846	-120.58	-1.60489	-119.12	-1.66108	-117.496	-1.82643	-115.713	-2.02395	-113.713	-2.16687	-111.133	-2.22163	-108.361	-1.8225	-110.48	-1.32838	-111.995	-1.09275	-112.147	-0.9996
CO3	fcc_hcp_top_M	-131.69	-2.4479	-136.207	-2.46816	-136.699	-2.5567	-136.241	-2.82289	-135.144	-3.24174	-133.73	-3.61811	-131.932	-3.79975	-129.407	-3.41866	-125.794	-2.43969	-123.277	-2.29529	-125.284	-1.68868	-126.683	-1.33786	-126.795	-1.20445
CO3	fcc_hcp_top_Pt	-129.69	-0.44835	-136.185	-2.44683	-136.679	-2.53645	-136.473	-3.05534	-135.374	-3.47203	-133.851	-3.7388	-131.89	-3.75823	-129.407	-3.41846	-126.157	-2.80302	-122.923	-1.94194	-124.804	-1.20867	-126.227	-0.88181	-126.456	-0.86529
CO3	fcc_M	-128.884	0.35728	-134.73	-0.99086	-135.811	-1.66905	-135.85	-2.43206	-134.873	-2.971	-133.347	-3.23467	-131.246	-3.11401	-128.436	-2.44765	-124.544	-1.18963	-120.993	-0.01157	-123.021	0.57358	-124.811	0.53432	-125.317	0.27351
CO3	top_M	-130.387	-1.14513	-135.571	-1.83274	-136.138	-1.99615	-135.724	-2.30623	-134.621	-2.71937	-133.141	-3.02921	-131.206	-3.07355	-128.424	-2.43548	-125.276	-1.92157	-122.721	-1.7395	-124.839	-1.24404	-126.376	-1.03026	-126.496	-0.90509
CO3	top_Pt	-130.007	-0.76526	-135.602	-1.86294	-135.802	-1.65976	-134.848	-1.43027	-133.509	-1.60696	-131.994	-1.88207	-130.35	-2.21774	-128.424	-2.4353	-125.832	-2.4773	-122.901	-1.91954	-124.815	-1.21984	-126.232	-0.88689	-126.437	-0.84674
COO	fcc_hcp_M	-107.905	-0.37175	-112.441	-0.40995	-113.406	-0.97154	-112.96	-1.25079	-110.851	-0.65726	-108.983	-0.57838	-106.508	-0.08428	-103.709	0.57144	-100.496	1.15026	-97.8505	1.42291	-101.245	0.64163	-102.867	0.77042	-102.791	1.09199
COO	fcc_hcp_Pt	-106.73	0.8042	-110.88	1.1505	-111.095	1.33951	-110.146	1.5637	-108.749	1.4451	-107.248	1.15623	-105.653	0.77054	-103.709	0.57132	-101.122	0.52397	-98.2416	1.03182	-101.289	0.59787	-102.518	1.11919	-102.281	1.60187
COO	fcc_top_M	-106.202	1.3313	-110.839	1.19156	-111.397	1.03683	-110.971	0.73833	-109.908	0.2855	-108.658	-0.25382	-106.871	-0.44702	-104.173	0.10783	-100.392	1.25423	-97.6576	1.61589	-100.339	1.54783	-101.976	1.6616	-101.977	1.90568
COO	fcc_top_Pt	-107.605	-0.07094	-112.883	-0.85258	-113.851	-1.41709	-113.384	-1.6742	-111.513	-1.31941	-109.026	-0.62198	-106.657	-0.2326	-104.172	0.10884	-101.044	0.60181	-98.5327	0.74075	-101.242	0.64524	-102.866	0.77191	-102.621	1.26173
COOH	top_MPt	-112.232	-1.21288	-117.409	-1.89308	-117.766	-1.84707	-116.879	-1.6843	-115.077	-1.39836	-112.884	-0.99451	-110.519	-0.61015	-107.958	-0.19259	-104.635	0.49579	-102.061	0.6975	-104.724	0.64807	-106.746	0.37647	-107.241	0.12675
COOH	top_PtM	-111.15	-0.13104	-115.552	-0.03599	-115.806	0.11369	-115.378	-0.18361	-114.176	-0.49718	-112.652	-0.7633	-110.663	-0.75407	-107.958	-0.19238	-104.194	0.93686	-101.652	1.10652	-104.29	1.0823	-106.236	0.88664	-106.493	0.87471
COOH	top_Pt	-112.078	-1.05938	-117.357	-1.8411	-116.068	-0.14901	-115.412	-0.21717	-113.603	0.07544	-111.895	-0.00602	-110.034	-0.12491	-107.958	-0.19178	-105.37	-0.239	-102.721	0.03782	-105.006	0.36591	-106.809	0.31362	-106.965	0.40273
O1	fcc_M	-92.3671	0.72362	-97.1989	0.38876	-98.291	-0.29966	-97.8837	-0.61706	-96.0455	-0.29462	-93.4342	0.52696	-91.0713	0.90972	-88.5366	1.30121	-85.391	1.81233	-83.042	1.78848	-85.7407	1.70322	-87.5539	1.64055	-87.7177	1.72178
O1	fcc_Pt	-91.552	1.53868	-95.8291	1.75856	-96.0622	1.92913	-95.2127	2.05389	-93.7513	1.99958	-92.1989	1.76223	-90.4945	1.48646	-88.5366	1.30113	-85.9315	1.27174	-83.2129	1.61756	-85.9695	1.47434	-87.5415	1.65299	-87.5347	1.90483
O1	hcp_M	-92.1114	0.97935	-96.9283	0.65941	-98.291	-0.29972	-97.884	-0.61742	-96.0458	-0.29493	-93.3548	0.60632	-90.7692	1.21181	-88.1207	1.71708	-85.9311	1.27222	-83.2121	1.61837	-85.56	1.88385	-87.295	1.8995	-87.3638	2.07567
O1	hcp_Pt	-91.2666	1.82407	-95.5486	2.03907	-95.8002	2.19111	-94.9353	2.33132	-93.5146	2.23625	-91.9374	2.02373	-90.1759	1.80511	-88.1206	1.71718	-85.5665	1.6368	-82.7947	2.03571	-85.6137	1.83012	-87.1622	2.03227	-87.2104	2.22907
O2	fcc_hcp_M	-97.6827	2.58597	-103.184	1.5817	-104.57	0.5989	-104.092	0.35285	-101.456	1.47305	-98.8789	2.26028	-96.0575	3.10147	-93.0541	3.96167	-90.5573	3.824	-88.1296	3.87887	-91.2523	3.36956	-92.7222	3.65026	-92.3605	4.25696
O2	fcc_hcp_Pt	-97.5129	2.75585	-100.154	4.61128	-100.284	4.8852	-99.3561	5.08847	-98.0794	4.84946	-96.6557	4.48349	-95.0145	4.14447	-93.0534	3.96235	-90.5324	3.84887	-87.6623	4.34618	-90.7328	3.88905	-91.9326	4.43987	-91.8145	4.80302
O2	fcc_M	-98.3042	1.96447	-103.568	1.19723	-104.252	0.91757	-103.482	0.9626	-101.465	1.46394	-99.1093	2.02984	-96.5774	2.58158	-93.7259	3.28989	-90.4974	3.88392	-88.0923	3.91616	-91.2786	3.34325	-93.3722	3.00025	-93.6294	2.98806
O2	fcc_PtM	-97.513	2.75572	-102.034	2.73135	-103.573	1.59633	-103.109	1.33554	-101.437	1.49147	-99.0125	2.12663	-96.2105	2.94844	-93.7261	3.28968	-90.5573	3.82401	-88.1301	3.87836	-91.2525	3.36936	-92.722	3.65052	-92.5367	4.08077
OH1	top_Pt	-96.5314	0.04433	-101.899	-0.82676	-102.281	-0.80425	-99.9839	0.76769	-98.3703	0.86555	-96.3774	1.06872	-94.4288	1.03718	-92.2872	1.03554	-89.6719	1.01633	-87.2263	1.08916	-89.8835	1.04533	-91.7917	0.88778	-92.0418	0.88269
OH1	top_M	-97.0885	-0.51277	-101.906	-0.83303	-102.283	-0.80675	-101.383	-0.63133	-99.5867	-0.35079	-97.3613	0.08486	-94.9207	0.54526	-92.2881	1.03464	-88.9265	1.76178	-86.6754	1.64009	-89.3553	1.57357	-91.6459	1.03357	-92.247	0.67748
OH2	top_PtM	-107.554	-0.31524	-111.601	0.13439	-112.736	-0.59695	-112.202	-0.78762	-110.316	-0.41671	-107.729	0.3797	-104.881	1.24773	-102.245	1.74093	-98.8821	2.46914	-96.3944	2.58406	-99.1358	2.45604	-101.388	1.95402	-102.003	1.5845
OH2	top_Pt	-107.36	-0.12083	-112.123	-0.38768	-112.716	-0.57642	-109.921	1.49375	-108.344	1.55498	-106.275	1.83368	-104.373	1.75563	-102.245	1.74084	-99.643	1.70825	-97.1136	1.8649	-99.9565	1.63533	-101.921	1.42142	-102.16	1.42736
slab	slab	-85.9127		-90.4097		-90.8133		-90.0886		-88.5729		-86.7832		-84.803		-82.6598		-80.0253		-77.6525		-80.2659		-82.0165		-82.2615
Atomic structures
slab				CO1 bri_M				CO1 bri_Pt				CO1 fcc_M				CO1 fcc_Pt				CO1 hcp_M				CO1 hcp_Pt				CO1 top_M				CO1 top_Pt
CO2 bri_M				CO2 bri_Pt				CO2 fcc_hcp_M				CO2 fcc_hcp_Pt				CO2 top_fcc_MPt				CO2 top_Pt				CO2 top_PtM
CO3 fcc_hcp_top_M				CO3 fcc_hcp_top_Pt				CO3 fcc_M				CO3 top_M				CO3 top_Pt
COO fcc_hcp_M				COO fcc_hcp_Pt				COO fcc_top_M				COO fcc_top_Pt
COOH top_MPt				COOH top_Pt				COOH top_PtM
O1 fcc_M				O1 fcc_Pt				O1 hcp_M				O1 hcp_Pt
O2 fcc_hcp_M				O2 fcc_hcp_Pt				O2 fcc_M				O2 fcc_PtM
OH1 top_Pt				OH1 top_Ru
								Equations used to calculate binding energies
OH2 top_Pt				OH2 top_PtM
